# Supplementary material for: Co-carriage of Staphylococcus aureus, Streptococcus pneumoniae, Haemophilus influenzae and Moraxella catarrhalis among three different age categories of children in Hungary
Source: PubMed Central journal article supplement (PMC7006921; doi:10.1371/journal.pone.0229021), 2020-02-07
Supplement: pone.0229021.s006.pdf [file pone.0229021.s006.pdf]

Fig 6 was generated from these original *S. pneumoniae* PFGE pictures.

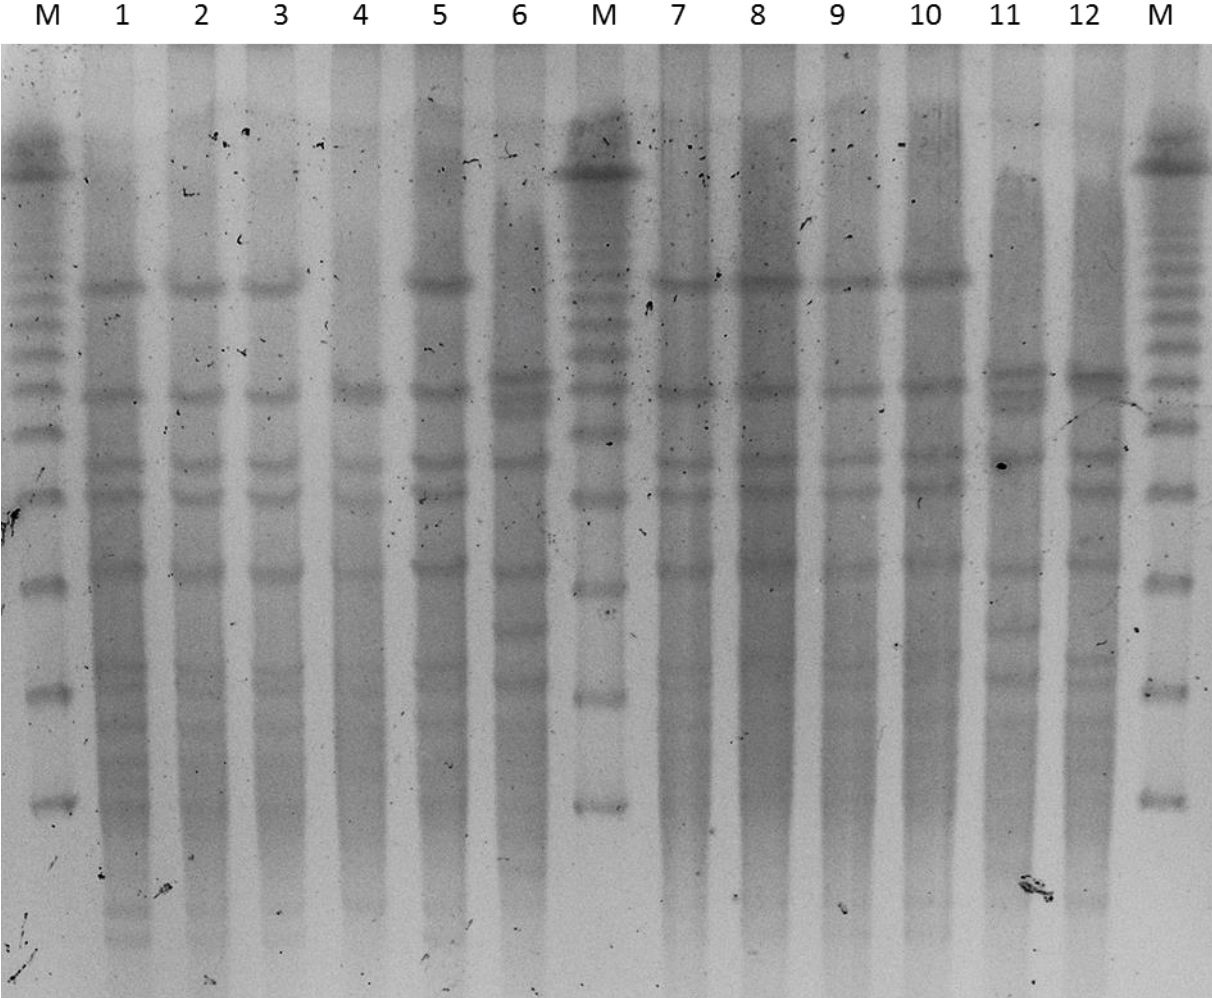

Lanes: M: molecular weight marker - lambda ( $\lambda$ ) ladder (CHEF DNA size standard; catalog no. 170-3635; Bio-Rad) 1. PP64 2. PP83 3. PP79 4. PP38 5. PP31 6. PP76 7. PP69 8. PP68 9. PP92 10. PP65 11. PP74 12. PP39

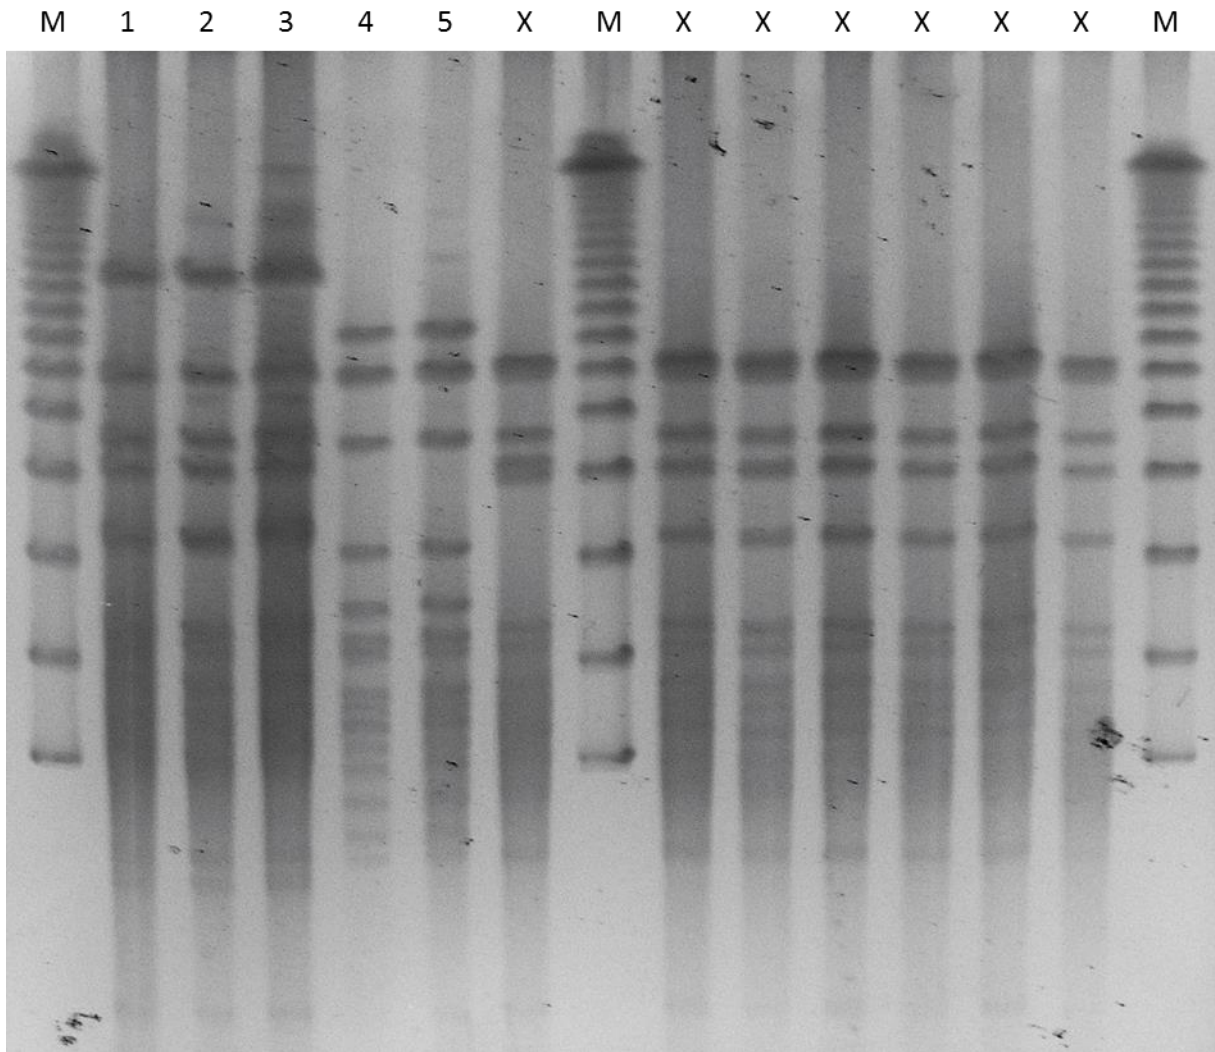

Lanes: M: molecular weight marker - lambda ( $\lambda$ ) ladder (CHEF DNA size standard; catalog no. 170-3635; Bio-Rad) 1. PP138 2. PP178 3. PP174 4. 6/6/9 5. 6/6/10

M X X X X X X M X 1 2 X X X M

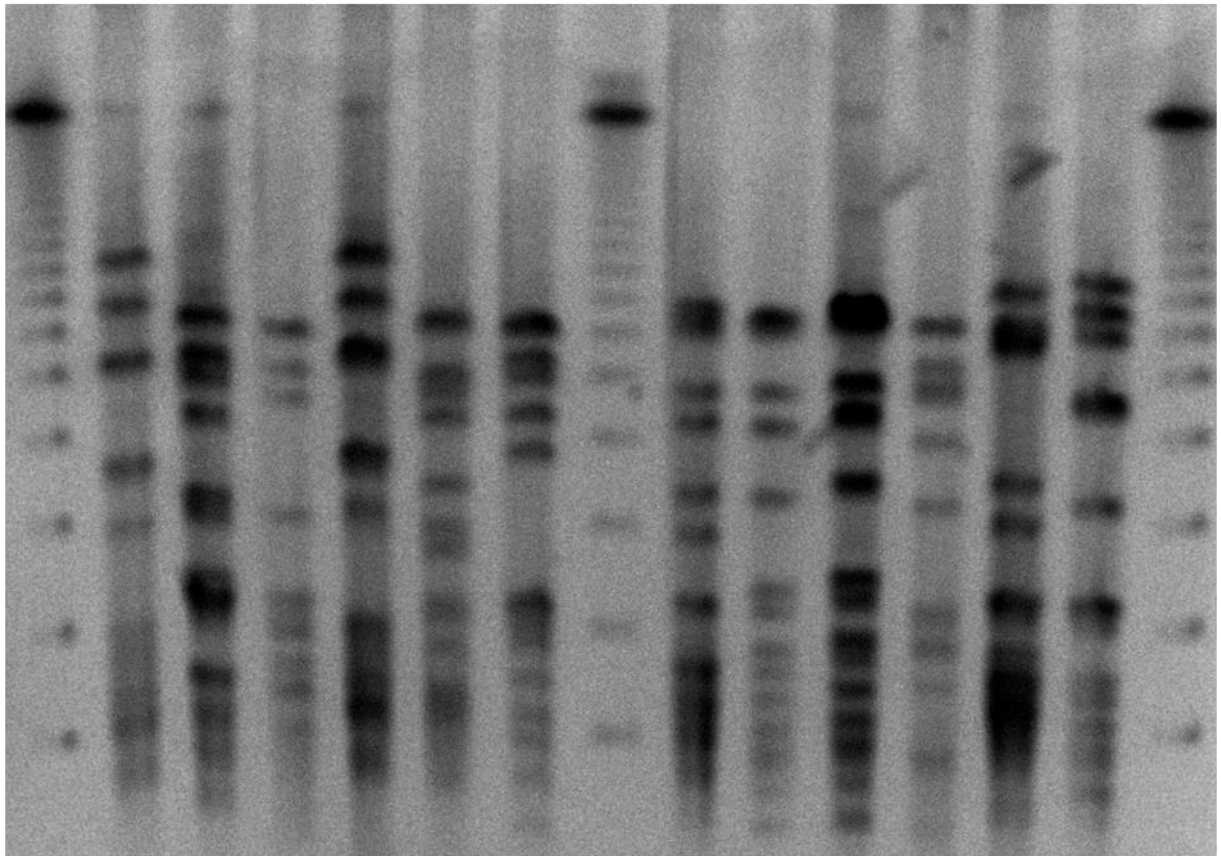

Lanes: M: molecular weight marker - lambda ( $\lambda$ ) ladder (CHEF DNA size standard; catalog no. 170-3635; Bio-Rad) 1. BT172 2. BT71

M 1 X X X X X M X X X X X X M

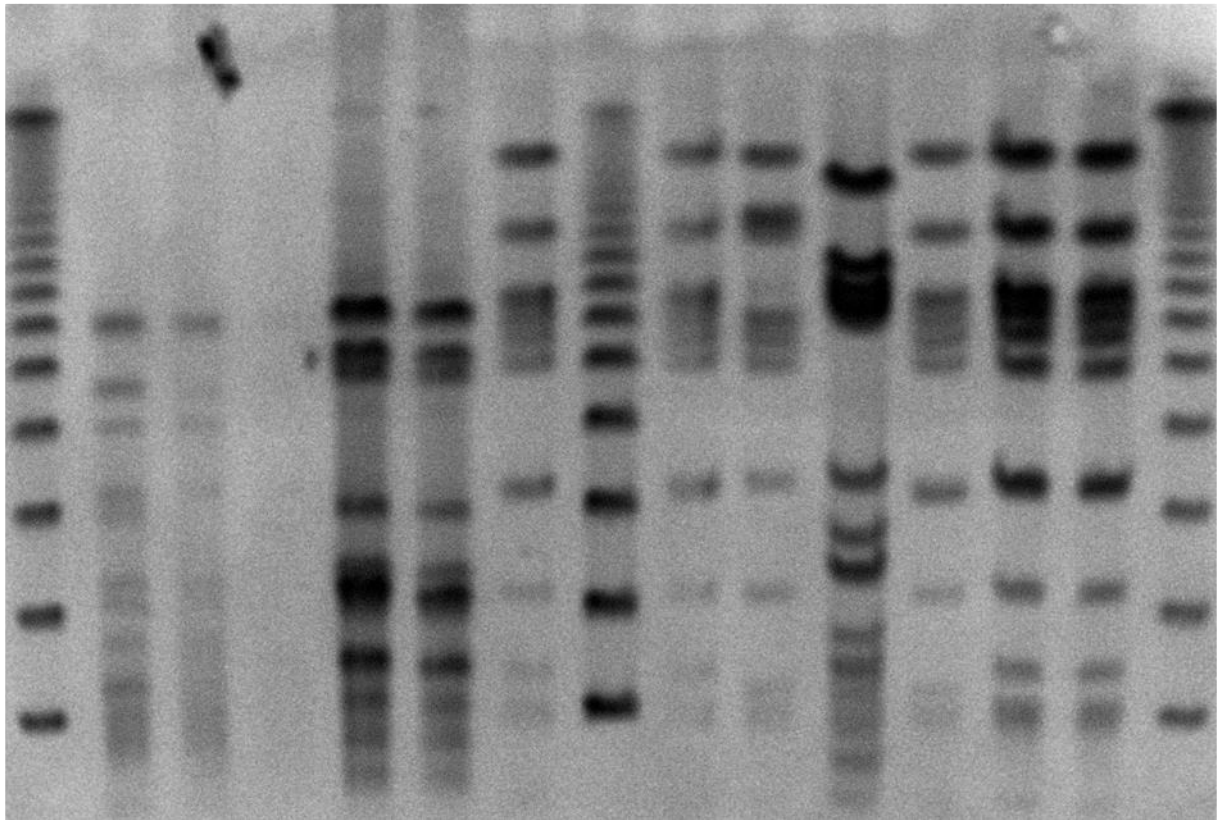

Lanes: M: molecular weight marker - lambda ( $\lambda$ ) ladder (CHEF DNA size standard; catalog no. 170-3635; Bio-Rad) 1. BT10

M X X X X 1 X M 2 X X X X X M

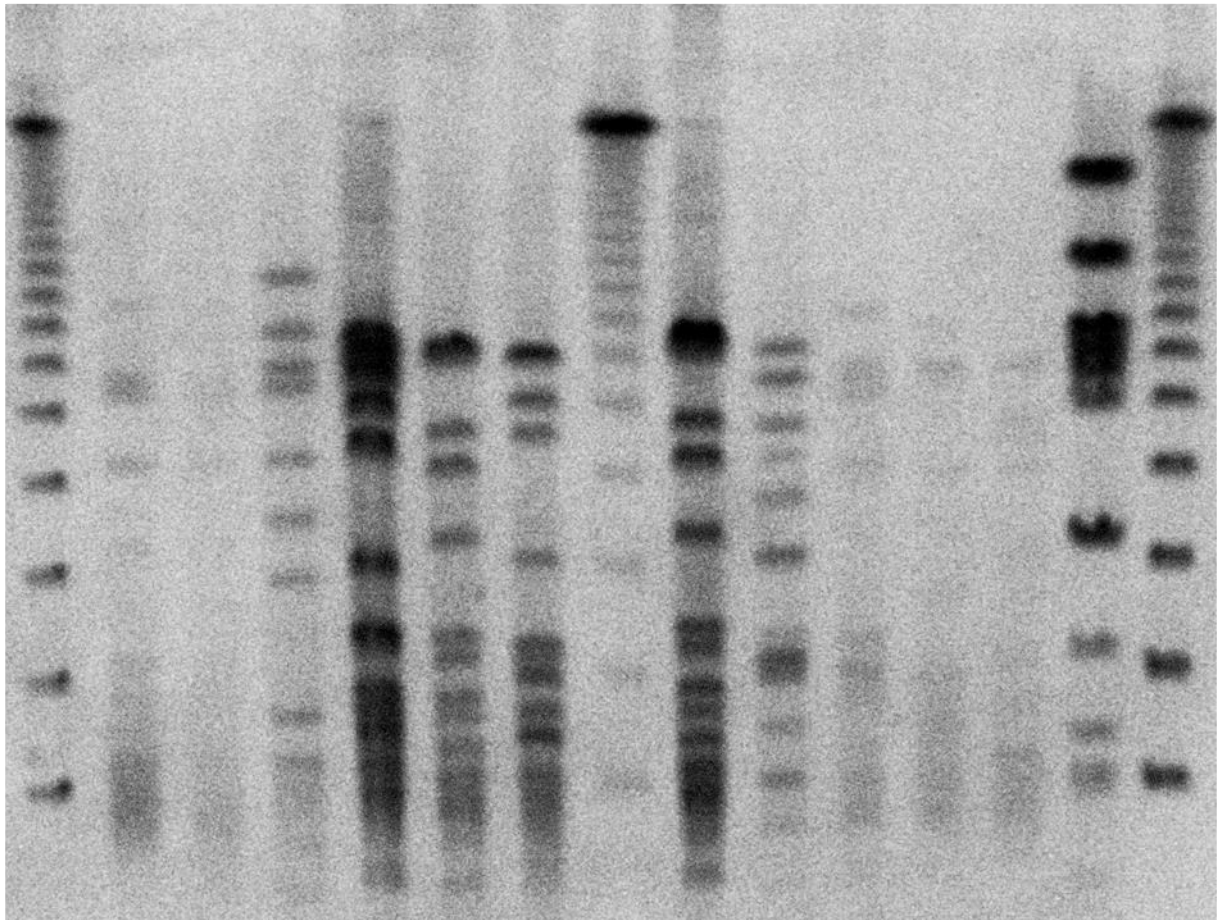

Lanes: M: molecular weight marker - lambda ( $\lambda$ ) ladder (CHEF DNA size standard; catalog no. 170-3635; Bio-Rad) 1. BT69 2. BT196/2
